# Supplementary material for: Tuning the defects of the triple conducting oxide BaCo0.4Fe0.4Zr0.1Y0.1O3−δ perovskite toward enhanced cathode activity of protonic ceramic fuel cells
Source: Royal Society of Chemistry journal article supplement (doi:10.1039/c9ta04335g), 2019-01-01
Supplement: c9ta04335g1.pdf [file c9ta04335g1.pdf]

## Supporting Information

Tuning the Defect of Triple Conducting Oxide  $\text{BaCo}_{0.4}\text{Fe}_{0.4}\text{Zr}_{0.1}\text{Y}_{0.1}\text{O}_{3-\delta}$   
Perovskite Toward Activity Enhanced Cathode of Protonic Ceramic Fuel Cells

*Rongzheng Ren,<sup>a</sup> Zhenhua Wang,<sup>\*,a,b</sup> Chunming Xu,<sup>a</sup> Wang Sun,<sup>a,b</sup> Jinshuo Qiao,<sup>a</sup> David W.  
Rooney<sup>c</sup> and Kening Sun<sup>\*,a,b</sup>*

<sup>a</sup> Beijing Key Laboratory for Chemical Power Source and Green Catalysis, School of Chemistry and Chemical Engineering, Beijing Institute of Technology, Beijing, 100081, People's Republic of China.

<sup>b</sup> Collaborative Innovation Center of Electric Vehicles in Beijing, No.5 Zhongguancun South Avenue, Haidian District, Beijing, 100081, People's Republic of China

<sup>c</sup> School of Chemistry and Chemical Engineering, Queen's University, Belfast, Northern Ireland BT9 5AG, United Kingdom

### Corresponding Author

\*Email: bitkeningsun@163.com (Kening Sun); wangzh@bit.edu.cn (Zhenhua Wang).

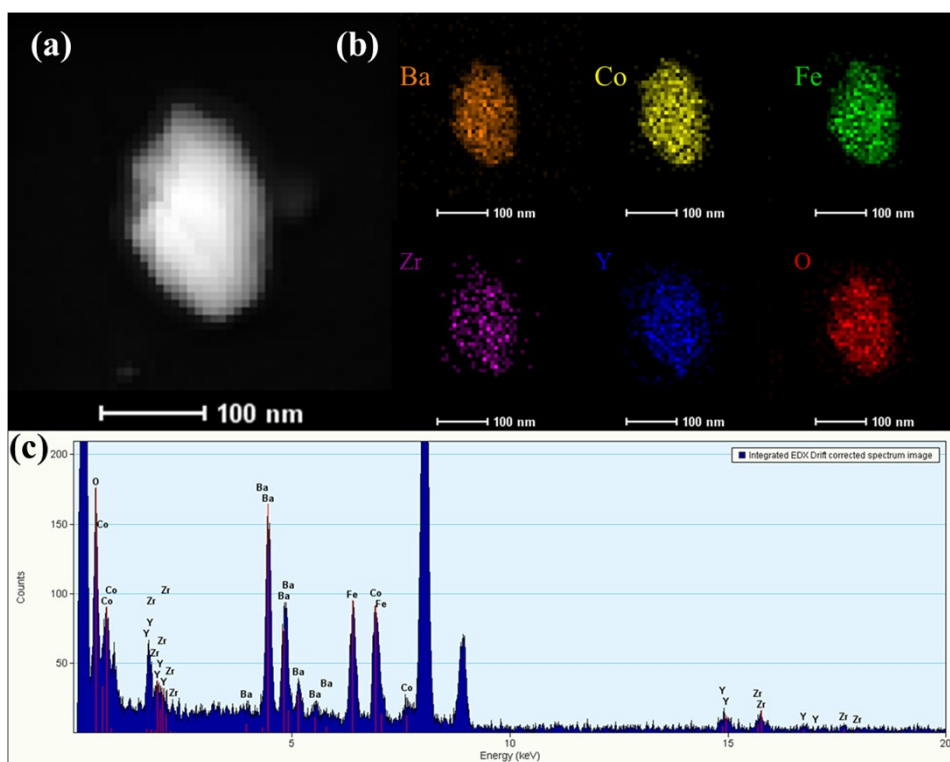

**Fig. S1** Typical STEM image (a); EDS elemental distributions (b) and corresponding EDS results in the  $\text{Ba}_{0.9}\text{Co}_{0.4}\text{Fe}_{0.4}\text{Zr}_{0.1}\text{Y}_{0.1}\text{O}_{3-\delta}$  oxide.

**Table S1.** The atomic percentage of each metal elements in  $\text{Ba}_{0.9}\text{Co}_{0.4}\text{Fe}_{0.4}\text{Zr}_{0.1}\text{Y}_{0.1}\text{O}_{3-\delta}$  sample estimated by STEM-EDS analysis.

| Elements              |      | Ba                          | Co                          | Fe                          | Zr                         | Y                          |
|-----------------------|------|-----------------------------|-----------------------------|-----------------------------|----------------------------|----------------------------|
| Atomic percentage (%) | Set  | 47.37 ( $\frac{0.9}{1.9}$ ) | 21.05 ( $\frac{0.4}{1.9}$ ) | 21.05 ( $\frac{0.4}{1.9}$ ) | 5.26 ( $\frac{0.1}{1.9}$ ) | 5.26 ( $\frac{0.1}{1.9}$ ) |
|                       | Test | 47.45                       | 21.12                       | 21.18                       | 5.14                       | 5.11                       |

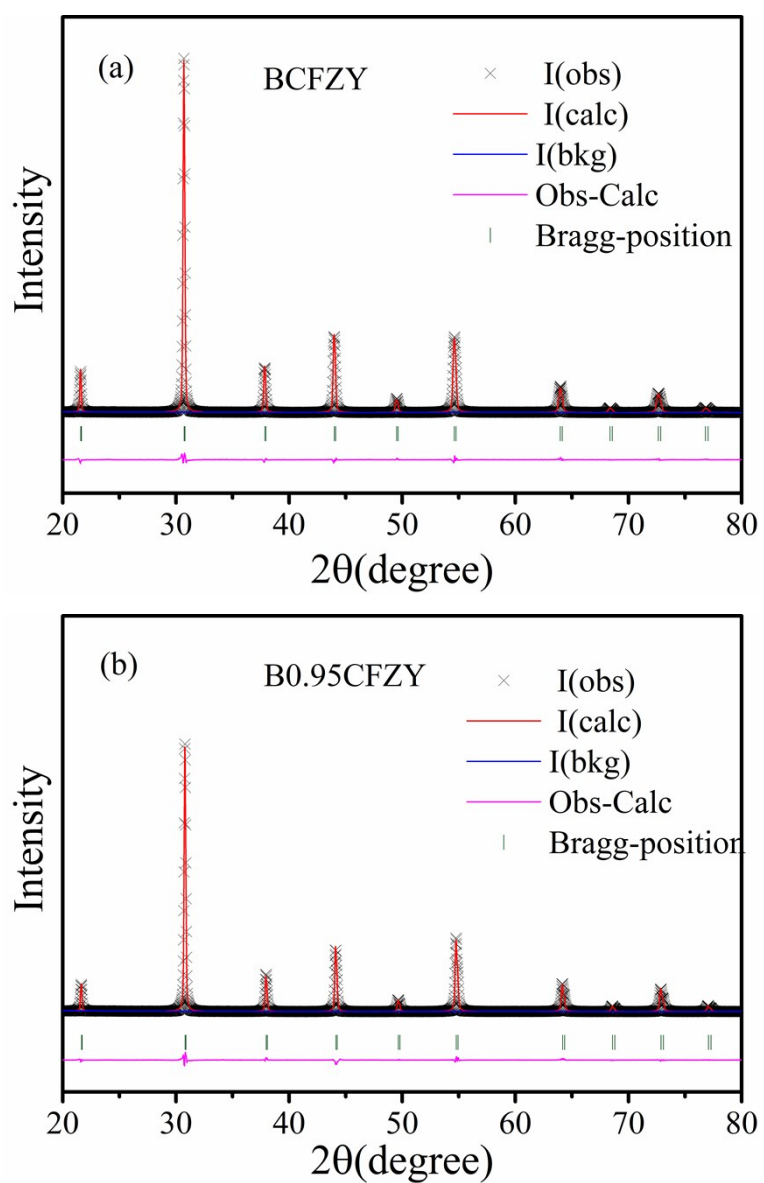

**Fig.S2** Room temperature powder XRD patterns with Rietveld refinements results of (a)

$\text{BaCo}_{0.4}\text{Fe}_{0.4}\text{Zr}_{0.1}\text{Y}_{0.1}\text{O}_{3-\delta}$  and (b)  $\text{Ba}_{0.95}\text{Co}_{0.4}\text{Fe}_{0.4}\text{Zr}_{0.1}\text{Y}_{0.1}\text{O}_{3-\delta}$ .

**Table S2.** Summary of Rietveld refinement results of powder X ray diffraction for  $\text{Ba}_x\text{Co}_{0.4}\text{Fe}_{0.4}\text{Zr}_{0.1}\text{Y}_{0.1}\text{O}_{3-\delta}$  ( $x=1, 0.95, 0.9$ )

| Samples               | $\text{BaCo}_{0.4}\text{Fe}_{0.4}\text{Zr}_{0.1}\text{Y}_{0.1}\text{O}_{3-\delta}$   | $\text{Ba}_{0.95}\text{Co}_{0.4}\text{Fe}_{0.4}\text{Zr}_{0.1}\text{Y}_{0.1}\text{O}_{3-\delta}$ | $\text{Ba}_{0.9}\text{Co}_{0.4}\text{Fe}_{0.4}\text{Zr}_{0.1}\text{Y}_{0.1}\text{O}_{3-\delta}$ |
|-----------------------|--------------------------------------------------------------------------------------|--------------------------------------------------------------------------------------------------|-------------------------------------------------------------------------------------------------|
| Space group           | Pm -3m                                                                               | Pm -3m                                                                                           | Pm -3m                                                                                          |
| Cell parameters       | a=b=c=4.112(8)<br>$\alpha=\beta=\gamma=90^\circ$<br>density=5.866 g·cm <sup>-3</sup> | a=b=c=4.101(0)<br>$\alpha=\beta=\gamma=90^\circ$<br>density=5.718 g·cm <sup>-3</sup>             | a=b=c=4.093(3)<br>$\alpha=\beta=\gamma=90^\circ$<br>density=5.544 g·cm <sup>-3</sup>            |
| Ba, 1b, 0, 0, 0       |                                                                                      |                                                                                                  |                                                                                                 |
| Uiso, Occupancy       | 0.00137, 1                                                                           | 0.00284, 0.95                                                                                    | 0.00182, 0.9                                                                                    |
| Co, 1a, 1/2, 1/2, 1/2 |                                                                                      |                                                                                                  |                                                                                                 |
| Uiso, Occupancy       | 0.01682, 0.4                                                                         | 0.05033, 0.4                                                                                     | 0.05266, 0.4                                                                                    |
| Fe, 1a, 1/2, 1/2, 1/2 |                                                                                      |                                                                                                  |                                                                                                 |
| Uiso, Occupancy       | 0.00034, 0.4                                                                         | 0.00036, 0.4                                                                                     | 0.000492, 0.4                                                                                   |
| Zr, 1a, 1/2, 1/2, 1/2 |                                                                                      |                                                                                                  |                                                                                                 |
| Uiso, Occupancy       | 0.0003, 0.1                                                                          | 0.00479, 0.1                                                                                     | 0.00195, 0.1                                                                                    |
| Y, 1a, 1/2, 1/2, 1/2  |                                                                                      |                                                                                                  |                                                                                                 |
| Uiso, Occupancy       | 0.00011, 0.1                                                                         | 0.00178, 0.1                                                                                     | 0.01167, 0.1                                                                                    |
| O, 3d, 1/2, 0, 1/2    |                                                                                      |                                                                                                  |                                                                                                 |
| Uiso, Occupancy       | 0.03782, 0.9274                                                                      | 0.04371, 0.8982                                                                                  | 0.03187, 0.8637                                                                                 |
| Riveted Refinement    | $R_p=3.76\%$                                                                         | $R_p=4.37\%$                                                                                     | $R_p=3.65\%$                                                                                    |
| Parameters            | $R_{wp}=5.07\%$                                                                      | $R_{wp}=5.65\%$                                                                                  | $R_{wp}=5.25\%$                                                                                 |
|                       | $\chi^2=2.338$                                                                       | $\chi^2=2.203$                                                                                   | $\chi^2=1.966$                                                                                  |

**Table S3.** The composition of lattice oxygen and surface adsorption oxygen species in  $\text{Ba}_x\text{Co}_{0.4}\text{Fe}_{0.4}\text{Zr}_{0.1}\text{Y}_{0.1}\text{O}_{3-\delta}$  ( $x=1, 0.95, 0.9$ ) oxides obtained from fitting peaks.

| Samples  | $\text{O}_{\text{lattice}}$ |       |           | $\text{O}_{\text{abs}}$ |       |           | Area ratio                                        |
|----------|-----------------------------|-------|-----------|-------------------------|-------|-----------|---------------------------------------------------|
|          | Position (eV)               | Area  | FWHM (eV) | Position (eV)           | Area  | FWHM (eV) | $\text{O}_{\text{lattice}}/\text{O}_{\text{abs}}$ |
| $x=1.00$ | 528.196                     | 12336 | 1.047     | 530.762                 | 21698 | 1.677     | 0.568                                             |
| $x=0.95$ | 528.124                     | 7154  | 1.004     | 530.773                 | 22515 | 2.016     | 0.317                                             |
| $x=0.90$ | 528.147                     | 4722  | 1.187     | 530.727                 | 17907 | 1.748     | 0.264                                             |

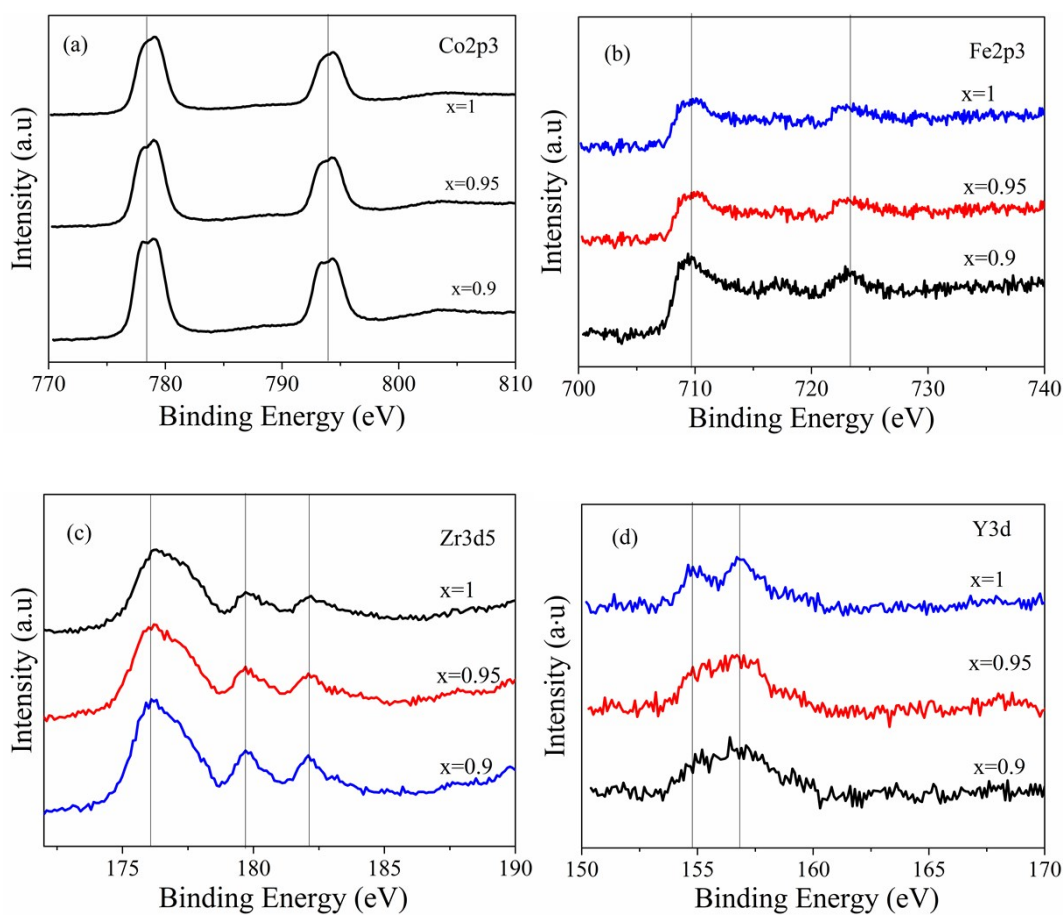

**Fig. S3** XPS spectra of  $\text{Ba}_x\text{Co}_{0.4}\text{Fe}_{0.4}\text{Zr}_{0.1}\text{Y}_{0.1}\text{O}_{3-\delta}$  ( $x=1, 0.95, 0.9$ ) powders: (a) Co 2p, (b) Fe 2p, (c) Zr 3d, and (d) Y 3d.

In  $\text{Ba}_x\text{Co}_{0.4}\text{Fe}_{0.4}\text{Zr}_{0.1}\text{Y}_{0.1}\text{O}_{3-\delta}$  ( $x = 1, 0.95, 0.9$ ) system, only Co and Fe ions show variable valence and can be reduced by  $\text{I}^-$  ions. So the oxygen nonstoichiometry ( $\delta$ ) can be determined by the iodometry titration method. The chemical eqs involved in titration process are listed in eq S1 and S2.

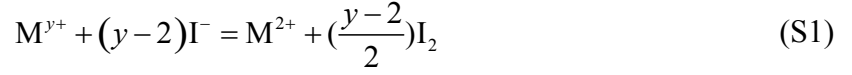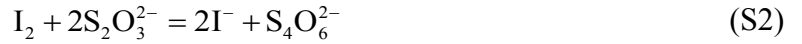

Where M represents Co and Fe elements, and  $y$  is their average valence state.

Based on the mass conservation during the chemical reaction, the eq S3 can be obtained.

$$\frac{0.8m}{xM_{\text{Ba}} + 0.4M_{\text{Fe}} + 0.4M_{\text{Co}} + 0.1M_{\text{Zr}} + 0.1M_{\text{Y}} + (3-\delta)M_{\text{O}}} = (y-2)cV \quad (\text{S3})$$

Where  $m$  is the mass of samples,  $M$  is the molar mass of the corresponding element,  $c$  and  $V$  denotes the concentration and volume of  $\text{Na}_2\text{S}_2\text{O}_3$  standard solution, respectively.

According to the charge neutrality in  $\text{Ba}_x\text{Co}_{0.4}\text{Fe}_{0.4}\text{Zr}_{0.1}\text{Y}_{0.1}\text{O}_{3-\delta}$  ( $x = 1, 0.95, 0.9$ ) system, the eq S4 can also be obtained.

$$2x + 0.8y + 4 \times 0.1 + 3 \times 0.1 = 2(3-\delta) \quad (\text{S4})$$

Obviously, oxygen vacancy content of the sample and the average oxidation states of Co/Fe ions can be calculated by solving the roots of eq S3 and S4. And the results were listed in Table S3.

**Table S4.** Oxygen nonstoichiometry ( $\delta$ ) in  $\text{Ba}_x\text{Co}_{0.4}\text{Fe}_{0.4}\text{Zr}_{0.1}\text{Y}_{0.1}\text{O}_{3-\delta}$  ( $x=1, 0.95, 0.9$ ) oxides at room temperature measured by the iodometry titration method.

| Samples  | Mass of sample (g) | Volume of $\text{Na}_2\text{S}_2\text{O}_3$ solution* (mL) | $\delta$ | Average valence of Co/Fe ions |
|----------|--------------------|------------------------------------------------------------|----------|-------------------------------|
| x = 1    | 0.0318             | 14.66                                                      | 0.29     | 3.41                          |
| x = 0.95 | 0.0302             | 14.58                                                      | 0.33     | 3.43                          |
| x = 0.9  | 0.0312             | 15.98                                                      | 0.36     | 3.47                          |

\*The concentration of  $\text{Na}_2\text{S}_2\text{O}_3$  standard solution is calibrated to  $0.011 \text{ mol}\cdot\text{L}^{-1}$ .

The oxygen nonstoichiometry at the high temperatures ( $\delta_t$ ) was calculated using eq S5 based on the TG test of samples in air.

$$\delta_t = \delta_0 + \frac{(m_0 - m_t) \times (M - 15.9994\delta_0)}{15.9994m_0} \quad (\text{S5})$$

where  $m_0$  is the initial and  $m_t$  means the actual weight of the  $\text{Ba}_x\text{Co}_{0.4}\text{Fe}_{0.4}\text{Zr}_{0.1}\text{Y}_{0.1}\text{O}_{3-\delta}$  sample at the interrelated temperature, while  $M$  means the molar mass of  $\text{Ba}_x\text{Co}_{0.4}\text{Fe}_{0.4}\text{Zr}_{0.1}\text{Y}_{0.1}\text{O}_{3-\delta}$  with stoichiometric oxygen content.

The hopping transport mechanism of hole(electron) in  $ABO_3$  perovskite can be ascribed to the Zener double exchange conduction process, where  $B^{n+}$  cation captures an electron from an adjacent  $B^{(n-1)+}$  cation mediated by the O 2p orbital as described in eq S6.<sup>1</sup>

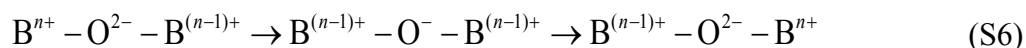

As shown in Figure S4, the electronic conductivity of  $B_xCFZY$  decreases with the increase of Ba deficiency. The main reason is probably that the appearance of oxygen vacancies ( $B - V_O^{\ominus} - B$ ) interrupts the -B-O-B- links and thus impairs the Zener double exchange conduction process, leading to the decrease of electrical conductivity.<sup>2</sup>

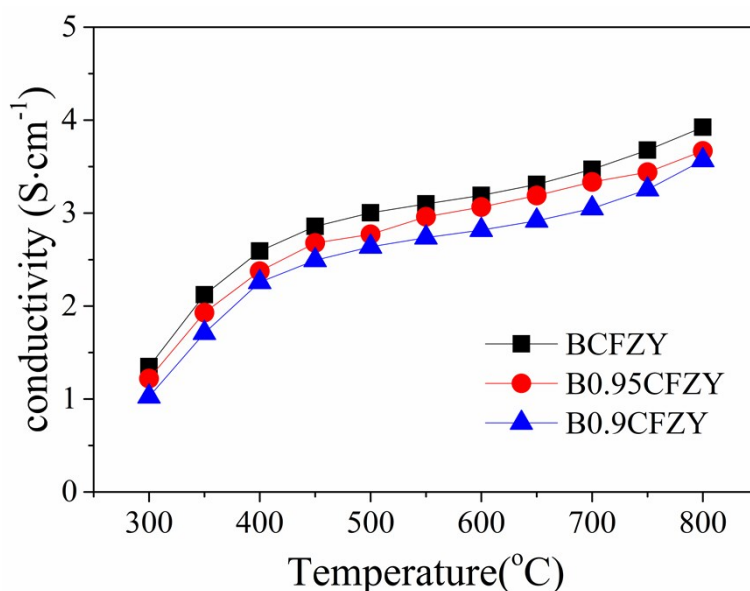

**Fig. S4** Electrical conductivity of  $Ba_xCo_{0.4}Fe_{0.4}Zr_{0.1}Y_{0.1}O_{3-\delta}$  ( $x = 1, 0.95, 0.9$ ) oxides as a function of temperature measured at dry air.



The electrical conductivity relaxation (ECR) technique was employed using the testing apparatus shown in Figure S5(a).

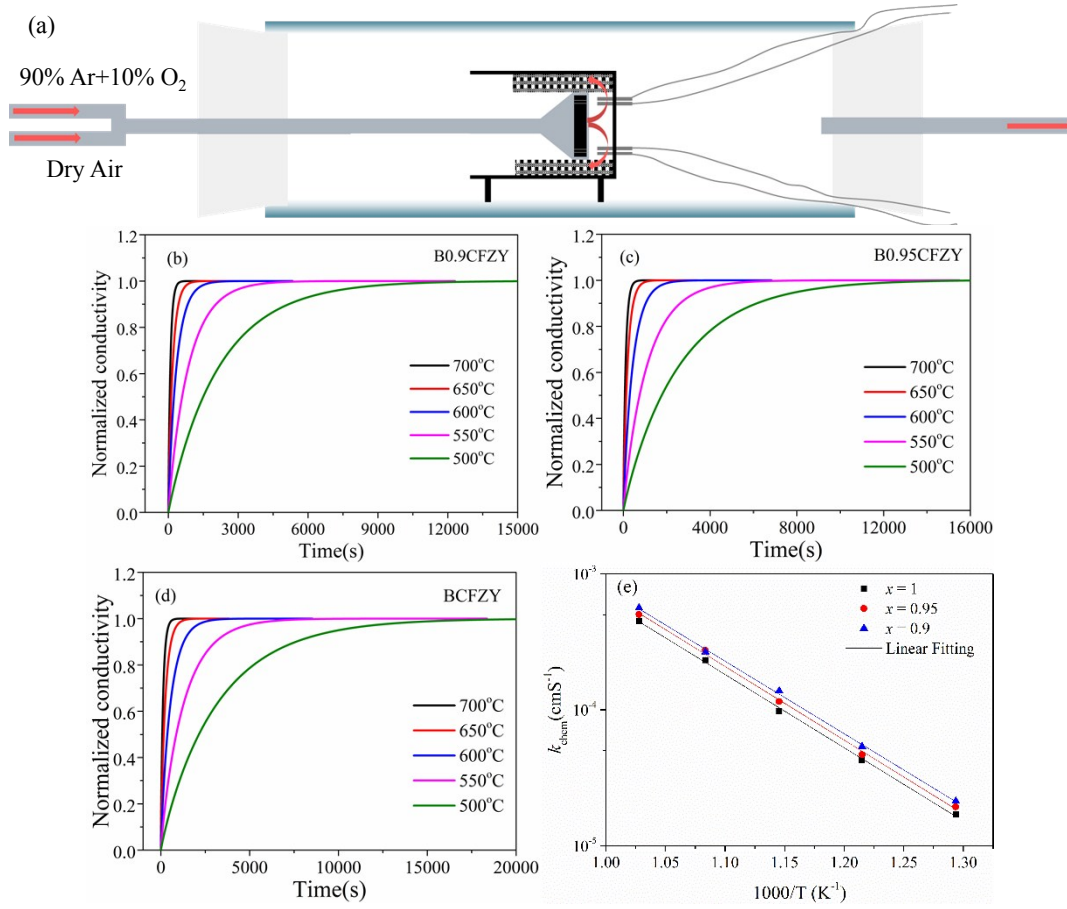

**Fig. S5** Test and calculation of the electrical conductivity relaxation. (a) testing apparatus of ECR. And the ECR curves of (b) B0.9CFZY, (c) B0.95CFZY and (d) BCFZY at 500~700 °C after sudden change of oxygen partial pressure from 0.21 to 0.1 atm; (e) Temperature-dependence of fitted  $k_{\text{chem}}$  from 500 to 700 °C.

The chemical bulk diffusion coefficient ( $D_{\text{chem}}$ ) and surface exchange coefficient ( $k_{\text{chem}}$ ) were gotten by fitting the electrical conductivity relaxation curves with eq (S7).

$$f(t) = \frac{\sigma(t) - \sigma(0)}{\sigma(\infty) - \sigma(0)} = 1 - \sum_{m=1}^{\infty} \sum_{n=1}^{\infty} \sum_{l=1}^{\infty} \frac{2L_x^2 \exp\left(\frac{-\alpha_m^2 D_{\text{chem}} t}{x^2}\right)}{\alpha_m^2 (\alpha_m^2 + L_x^2 + L_x)} \times \frac{2L_y^2 \exp\left(\frac{-\beta_n^2 D_{\text{chem}} t}{y^2}\right)}{\beta_n^2 (\beta_n^2 + L_y^2 + L_y)} \times \frac{2L_z^2 \exp\left(\frac{-\gamma_l^2 D_{\text{chem}} t}{z^2}\right)}{\gamma_l^2 (\gamma_l^2 + L_z^2 + L_z)} \quad (\text{S7})$$

Where  $f(t)$  is defined as normalized conductivity, while  $\sigma(0)$ ,  $\sigma(t)$  and  $\sigma(\infty)$  denotes the initial, time dependent and final conductivity, respectively. And eq (S8) shows the calculation process of parameters  $L_x$ ,  $L_y$  and  $L_z$ , respectively.

$$L_x = x \frac{k_{chem}}{D_{chem}}, L_y = y \frac{k_{chem}}{D_{chem}}, L_z = z \frac{k_{chem}}{D_{chem}} \quad (S8)$$

And the coefficient  $\alpha_m$ ,  $\beta_n$  and  $\gamma_l$  is the  $m$ -th,  $n$ -th and  $l$ -th positive root of the transcendental eq (S9), respectively.

$$\alpha_m \tan \alpha_m = L_x, \beta_n \tan \beta_n = L_y, \gamma_l \tan \gamma_l = L_z \quad (S9)$$

**Table S5.**  $k_{chem}$  and  $D_{chem}$  at various temperature for  $Ba_xCo_{0.4}Fe_{0.4}Zr_{0.1}Y_{0.1}O_{3-\delta}$  ( $x=1, 0.95, 0.9$ ) cuboid strip.

| Temperature<br>(°C) | $x = 0.9$                                       |                                                   | $x = 0.95$                                      |                                                   | $x = 1$                                         |                                                   |
|---------------------|-------------------------------------------------|---------------------------------------------------|-------------------------------------------------|---------------------------------------------------|-------------------------------------------------|---------------------------------------------------|
|                     | $k_{chem} \times 10^4$<br>( $cm \cdot s^{-1}$ ) | $D_{chem} \times 10^5$<br>( $cm^2 \cdot s^{-1}$ ) | $k_{chem} \times 10^4$<br>( $cm \cdot s^{-1}$ ) | $D_{chem} \times 10^5$<br>( $cm^2 \cdot s^{-1}$ ) | $k_{chem} \times 10^4$<br>( $cm \cdot s^{-1}$ ) | $D_{chem} \times 10^5$<br>( $cm^2 \cdot s^{-1}$ ) |
| 700                 | 5.62                                            | 4.50                                              | 5.03                                            | 3.14                                              | 4.51                                            | 2.38                                              |
| 650                 | 2.67                                            | 2.08                                              | 2.74                                            | 1.59                                              | 2.32                                            | 1.04                                              |
| 600                 | 1.38                                            | 1.14                                              | 1.15                                            | 0.85                                              | 0.97                                            | 0.55                                              |
| 550                 | 0.54                                            | 0.57                                              | 0.47                                            | 0.29                                              | 0.43                                            | 0.21                                              |
| 500                 | 0.213                                           | 0.22                                              | 0.19                                            | 0.13                                              | 0.17                                            | 0.085                                             |

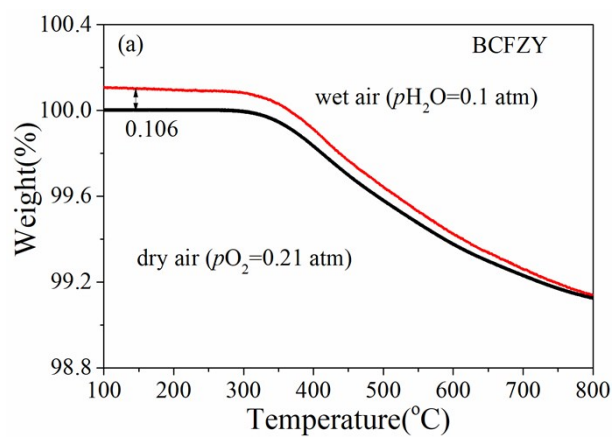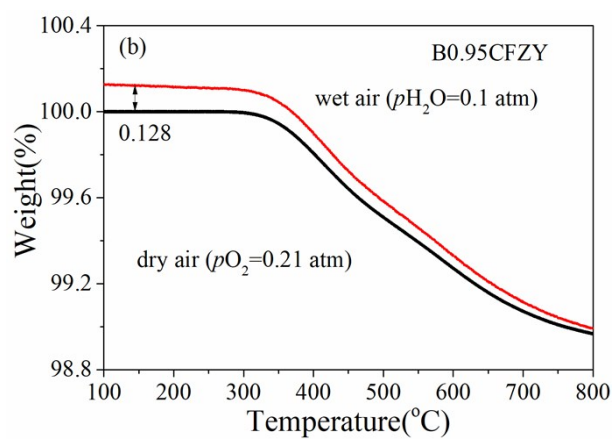

**Fig. S6.** Thermogravimetric curves of (a) BCFZY and (b) B0.95CFZY during cooling stage under dry and wet air.

The formation of proton is through the combination of water and oxygen vacancies in cathode materials. And the water is also produced in the cathode of PCFCs. So a good chemical compatibility is very necessary between B<sub>x</sub>CFZY materials and water. To check it, hydrated materials were prepared with the following procedure. The raw B<sub>x</sub>CFZY powders were annealed under wet air ( $p_{\text{H}_2\text{O}} = 1 \text{ atm}$ , extreme wet condition to ensure the reliability) from 800 °C down to 500 °C with a cooling rate of 5 °C/min, followed by a temperature platform of 500 °C for 10 h, an enough duration to ensure the combination of water and oxygen vacancies. The sample was then cooled down slowly (5 °C/min) to the room temperature. The hydrated B<sub>x</sub>CFZY materials were tested by XRD to check the possible phase transition as shown in Figure S6.

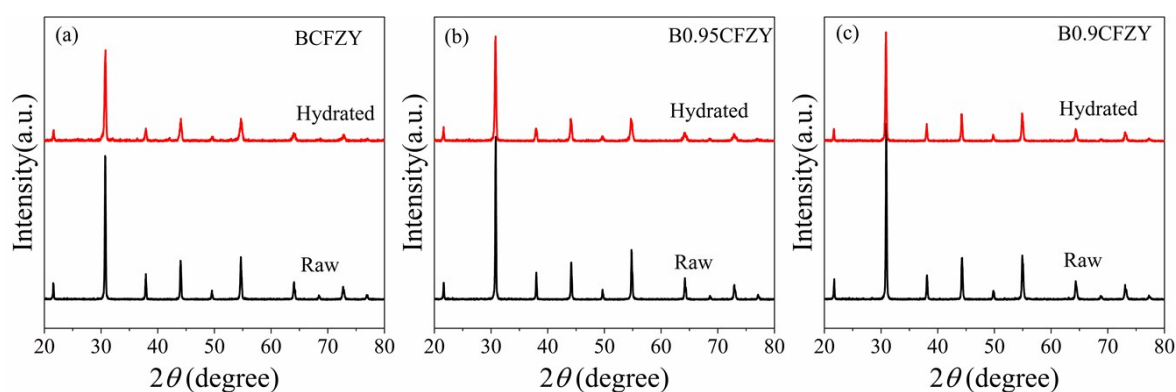

**Fig. S7.** XRD patterns of raw and hydrated  $\text{Ba}_x\text{Co}_{0.4}\text{Fe}_{0.4}\text{Zr}_{0.1}\text{Y}_{0.1}\text{O}_{3-\delta}$  ( $x = 1, 0.95, 0.9$ ) oxides.

(a)  $x = 1$ , (b)  $x = 0.95$ , (c)  $x = 0.9$ .

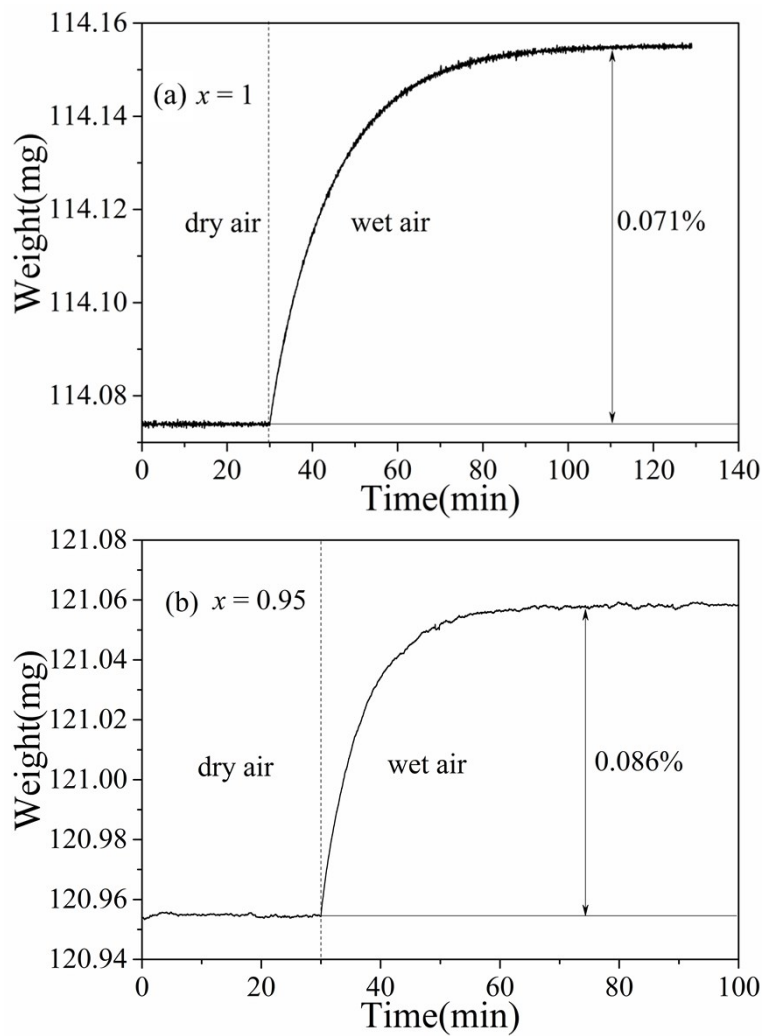

**Fig. S8.** Thermogravimetric relaxation curves for  $\text{Ba}_x\text{Co}_{0.4}\text{Fe}_{0.4}\text{Zr}_{0.1}\text{Y}_{0.1}\text{O}_{3-\delta}$  pellet samples upon changing  $p\text{H}_2\text{O}$  from dry condition to  $p\text{H}_2\text{O} = 0.1\text{atm}$  at  $500\text{ }^\circ\text{C}$ . (a)  $x = 1$  (b)  $x = 0.95$ .

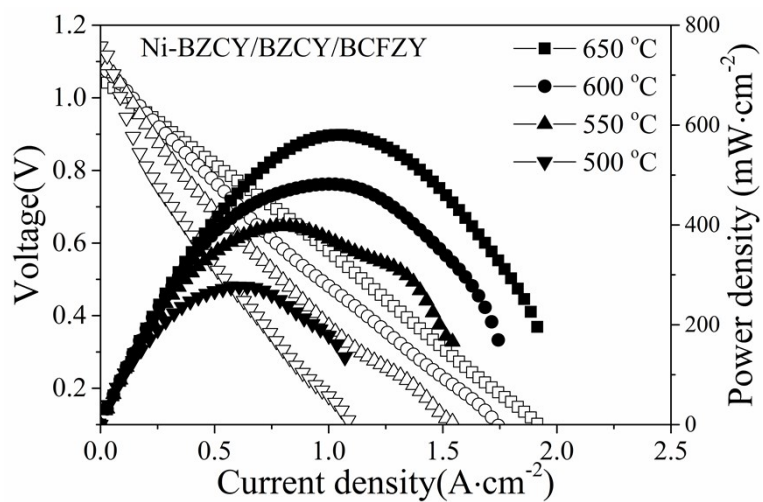

**Fig. S9** Current-Voltage and Current-power density curves of cells based on BCFZY cathode operated from 650 to 500 °C, with humidified  $H_2$  (3%  $H_2O$ ) as anode fuel and ambient air as oxidant.
